# Supplementary material for: Overexpression of ERCC3 is associated with poor prognosis in patients with pancreatic cancer
Source: PubMed Central journal article supplement (PMC8040713; doi:10.7150/jca.54576), 2021-03-05
Supplement: jcav12p2550s1.pdf [file jcav12p2550s1.pdf]

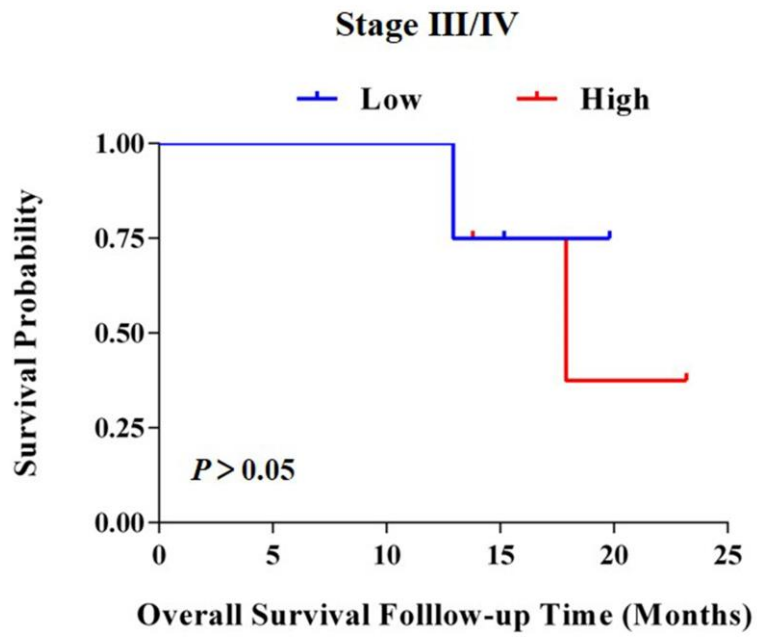

**Supplement Figure 1. The prognostic significance of ERCC3 in 8 patients with Stage III/IV pancreatic cancer based on TCGA data mining.**
